# Supplementary material
Source: PubMed Central journal article supplement (PMC4846630)
Supplement: 10616_2014_9788_MOESM1_ESM.pdf [file 10616_2014_9788_MOESM1_ESM.pdf]

| GPC for digest GAGs |      |      |
|---------------------|------|------|
| Sample name         | Mw   | PDI  |
| Dp2                 | 523  | 1.12 |
| Dp4                 | 1013 | 1    |
| Dp8                 | 2246 | 1.20 |

1. Mw is Molecular weight
2. PDI is polydispersity.
